# Supplementary material for: Controlled synthesis of brightly fluorescent CH3NH3PbBr3perovskite nanocrystals employing Pb(C17H33COO)2as the sole lead source
Source: Royal Society of Chemistry journal article supplement (doi:10.1039/c7ra11832e), 2018-01-01
Supplement: c7ra11832e1.pdf [file c7ra11832e1.pdf]

Supporting Information for

Controlled Synthesis of Brightly Fluorescent CH<sub>3</sub>NH<sub>3</sub>PbBr<sub>3</sub> Perovskite  
Nanocrystals Employing Pb(C<sub>17</sub>H<sub>33</sub>COO)<sub>2</sub> as Sole Lead Source

*Xiaoming Fu*<sup>1, 3, †</sup>, *Zhiwei Peng*<sup>2, †</sup>, *Chi Zhang*<sup>1</sup>, *Yong Xia*<sup>1</sup>, *Jianbing Zhang*<sup>1</sup>, *Wei Luo*<sup>1, 5</sup>, *L. Jay Guo*<sup>5</sup>,  
*Honglang Li*<sup>4, \*</sup>, *YuHuang Wang*<sup>2, \*</sup>, and *Daoli Zhang*<sup>1, 2, \*</sup>

<sup>1</sup> School of Optical and Electronic Information, Huazhong University of Science and Technology,  
1037 Luoyu Road, Hongshan District, Wuhan City, Hubei Province, 430074, P. R. China

<sup>2</sup> Department of Chemistry and Biochemistry, University of Maryland, 8051 Regent Drive, College  
Park, MD 20742, United States

<sup>3</sup> School of Physics, Communication and Electronics, Jiangxi Normal University, 99 Ziyang Avenues,  
Nanchang City, Jiangxi Province, 330022, P. R. China

<sup>4</sup> Institute of Acoustics, Chinese Academy of Sciences, 21 North 4<sup>th</sup> Ring Road, Haidian District,  
Beijing 100190, P. R. China

<sup>5</sup> Department of Electrical Engineering and Computer Science, University of Michigan, Ann Arbor,  
MI 48109, United States

† These authors contribute equally to this work.

\* To whom correspondence should be addressed. E-mail: [zhang\\_daoli@hust.edu.cn](mailto:zhang_daoli@hust.edu.cn) (Daoli Zhang); [yhw@umd.edu](mailto:yhw@umd.edu) (YuHuang Wang); and [lhl@mail.ioa.ac.cn](mailto:lhl@mail.ioa.ac.cn) (Honglang Li)

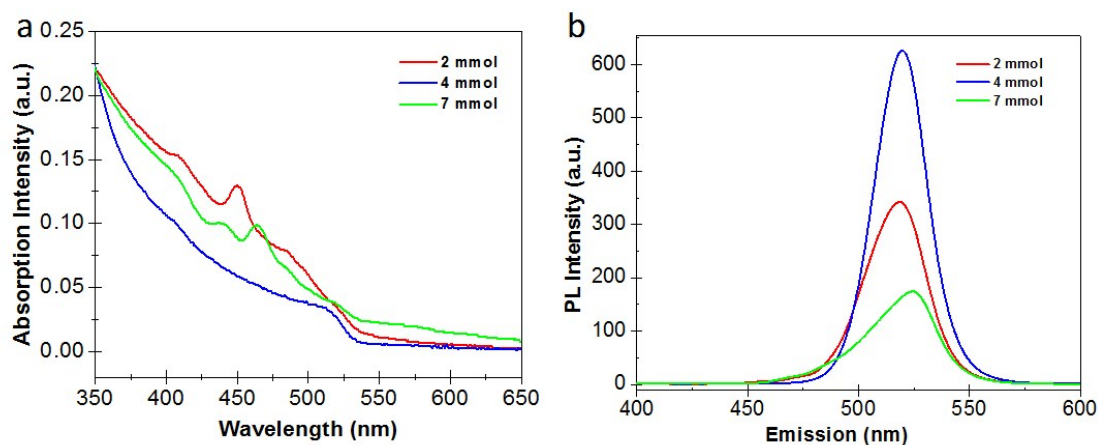

**Figure S1.** UV-Vis absorption (a) and PL emission spectra (b) of  $\text{CH}_3\text{NH}_3\text{PbBr}_3$  perovskite NCs synthesized from different amount of Pb-oleate with an  $\text{OA}^+:\text{MA}^+$  ratio of 4:6. The total amount of alkyl ammonium halides ( $\text{OA}^+ + \text{MA}^+$ ) was set as 4 mmol.

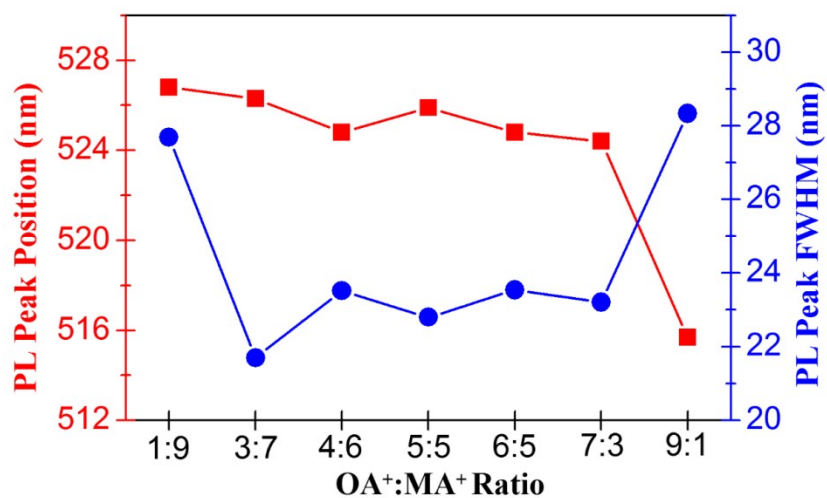

**Figure S2.** The position and full width at half maximum (FWHM) of the PL peak in  $\text{CH}_3\text{NH}_3\text{PbBr}_3$  perovskite nanoparticle solutions synthesized from Pb-oleate as the sole lead source and varying  $\text{OA}^+:\text{MA}^+$  ratios.

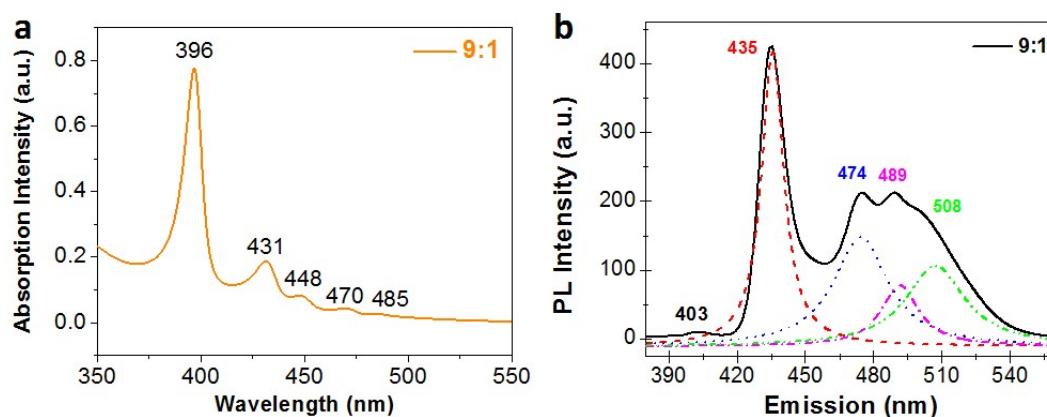

**Figure S3.** UV-Vis absorption (a) and PL emission spectra (b) of  $\text{CH}_3\text{NH}_3\text{PbBr}_3$  perovskite NCs synthesized from  $\text{PbBr}_2$ +Pb-oleate as lead source with an  $\text{OA}^+:\text{MA}^+$  ratio of 9:1. The absorption peaks at 396, 431, 448, 470 and 485 nm correspond to the  $\text{CH}_3\text{NH}_3\text{PbBr}_3$  nanoplatelets with different number of layers from 1 to 5. Similarly, the PL emission curve can be fitted into five sub-peaks corresponding to nanoplatelets with 1, 2, 4, and 5 layers (403, 435, 474 and 489 nm) and QDs at 508 nm. The absence of the PL emission peak from 3-layer nanoplatelets may be due to the interference from adjacent strong peaks.

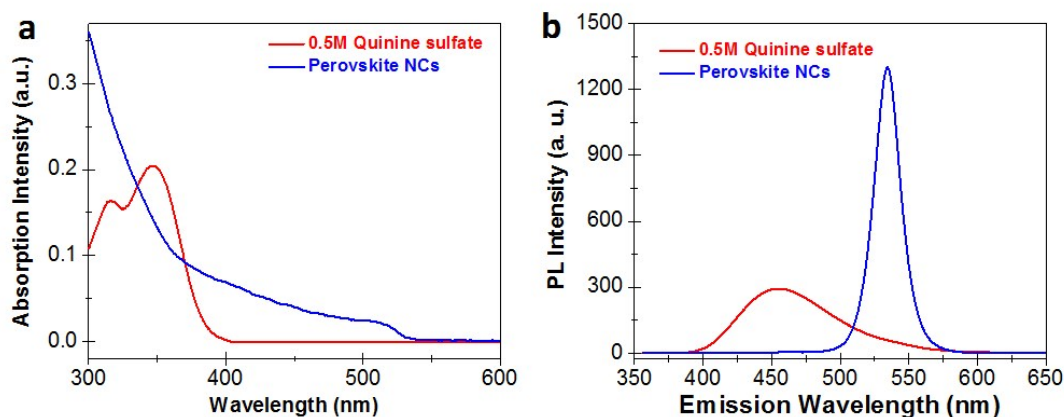

**Figure S4.** An example for the calculation of the PLQY of the  $\text{CH}_3\text{NH}_3\text{PbBr}_3$  perovskite NCs. Here, the sample using Pb-oleate as the sole lead source with an  $\text{OA}^+:\text{MA}^+$  ratio of 4:6 was measured against 0.5 mol/L quinine sulfate. (a) The UV-vis absorption curves. Two samples have the same absorbance at 336 nm. (b) The PL spectra at an excitation wavelength of 336 nm.

**Table S1.** XRD analysis of  $\text{CH}_3\text{NH}_3\text{PbBr}_3$  perovskite NCs (synthesized from Pb-oleate as sole lead source with an  $\text{OA}^+:\text{MA}^+$  ratio of 4:6) against the bulk  $\text{CH}_3\text{NH}_3\text{PbBr}_3$  perovskite.

| (h k l) | $\text{CH}_3\text{NH}_3\text{PbBr}_3$ NCs |       | Bulk $\text{CH}_3\text{NH}_3\text{PbBr}_3$ |       |
|---------|-------------------------------------------|-------|--------------------------------------------|-------|
|         | $2\theta$ (°)                             | d (Å) | $2\theta$ (°)                              | d (Å) |
| 100     | 15.08                                     | 5.87  | 14.48                                      | 6.12  |
| 110     | 20.10                                     | 4.42  | 20.72                                      | 4.29  |
| 200     | 30.23                                     | 2.96  | 29.68                                      | 3.01  |
| 210     | 33.97                                     | 2.64  | 33.31                                      | 2.69  |
| 211     | 37.19                                     | 2.42  | 36.66                                      | 2.45  |
| 220     | 43.23                                     | 2.09  | 42.65                                      | 2.12  |
| 300     | 45.84                                     | 1.98  | 45.40                                      | 1.99  |
